## Extended hormone-phenotypes shape the structure, stability, and assortment of social networks

Roslyn Dakin<sup>1,2</sup>, Ignacio T. Moore<sup>3</sup>, Brent M. Horton<sup>4</sup>, Ben J. Vernasco<sup>3</sup>, T. Brandt Ryder<sup>1,5</sup>

<sup>1</sup>Migratory Bird Center, Smithsonian Conservation Biology Institute, National Zoological Park, Washington, DC 20013, USA

<sup>2</sup>Current address: Department of Biology, Carleton University, Ottawa, Ontario K1S 5B6, Canada

<sup>3</sup>Department of Biological Sciences, Virginia Tech, Blacksburg, Virginia 24061, USA

<sup>4</sup>Department of Biology, Millersville University, Millersville, Pennsylvania 17551, USA

<sup>5</sup>Current address: Bird Conservancy of the Rockies, Fort Collins, Colorado, 80525, USA

Correspondence: rydert@si.edu

### Highlights (max 86 characters each)

- Testosterone predicts emergent social network properties in a cooperative bird
- High-testosterone groups exhibit collective behaviors that destabilize cooperation
- These effects are attributed to the dominant territory-holding males

### Summary

Testosterone is a key regulator of vertebrate social behavior. As such, testosterone can mediate and respond to social interaction dynamics [1–3]. Although experiments have demonstrated that testosterone signaling pathways can influence aggression and cooperation [2,4,5], no study has examined the links between hormone levels, behavioral phenotypes, and emergent properties of the social network. In other words, how do mechanisms underlying an individual's social behavior scale-up to influence the emergent properties of the network [6]? Here, we address this question by studying wire-tailed manakins, a species of bird in which males cooperate to court females at sites known as leks [7,8]. We used an automated proximity system to monitor multiple leks and measure the social network at each lek repeatedly through time. We also quantified the testosterone phenotype of all individuals in the lek. Our analysis examines how the collective hormone phenotype of individuals within the social network affects three emergent properties: social specialization (the exclusivity of social relationships), network stability (the persistence of partnerships through time), and behavioral assortment (like associating with like). These three properties are expected to enhance the benefits of cooperation [9–11]. We found that the manakin social networks with high-testosterone dominant individuals were less specialized, less stable, and had more negative behavioral assortment. Combined with our previous experiments [12], these results provide evidence that the extended hormone-phenotypes of individuals can shape the broader social architecture of animal groups.

Keywords: testosterone, androgens, cooperation, social networks, dynamic networks, collective behavior, behavioral endocrinology

## Results and Discussion

44 Testosterone signalling pathways can both mediate and respond to dynamic social environments  
46 in a diversity of vertebrates [5,13]. For example, hormone-signaling pathways at the level of the  
48 individual are essential for the development and expression of complex behavioral phenotypes  
50 [14], which are hypothesized to shape social interaction dynamics and higher order social  
network structure. Testing this hypothesis is challenging, because it requires linking fine-scale  
measures of behavior and physiology with broad-scale measurements that characterize the  
collective behavior of the group [15].

Here, we leverage a large and comprehensive dataset on the circulating hormone levels,  
52 behavioral phenotypes, and social networks of a cooperative bird, the wire-tailed manakin (*Pipra  
filicauda*), to test the hypothesis that testosterone-mediated behavior drives emergent social  
54 structure. Male wire-tailed manakins form cooperative display coalitions on sites known as leks  
to attract females [16]. These coalition partnerships are essential for male fitness [7,8] and form  
56 the basis of complex and dynamic social networks [7,17,18]. The social networks of wire-tailed  
manakins can also exhibit temporal variation in structure [19]. This is important because the  
58 emergent properties of the social network are theoretically predicted to influence the costs and  
benefits of cooperation, and hence shape selection on individual behavior. For example,  
60 cooperation in social networks is favored when individuals interact with a limited set of familiar  
partners, when these relationships are temporally stable, and when helping is reciprocated by  
62 immediate neighbors in the group [9–11].

Can hormone-phenotypes at the individual level scale-up to influence these processes?  
64 We have previously shown that male manakins differ in their circulating testosterone levels, with  
some individuals have consistently higher testosterone than others (Fig. 1A). Moreover, variation  
66 in testosterone level can also explain repeatable, among-individual differences in the frequency  
and number of social partnerships [12]. As observed in other vertebrates [5,20], these hormone-  
68 behavior relationships are status-specific in wire-tailed manakins. Among dominant, territory-  
holding males, high testosterone levels are associated with reduced cooperative behavior [12].  
70 However, in the subordinate, “floater” males, high testosterone is associated with increased  
cooperative behavior and subsequent territory acquisition [12], both of which are essential for  
72 reproductive fitness [7,21].

In this study, we used an automated proximity data-logging system to record over 36,000  
74 unique male-male social interactions. These data allowed us to analyze repeated measures of the  
weighted social networks at 11 different leks where manakin coalitions occur. A recent study  
76 showed that the collective hormonal profile of human social groups can predict group success at  
social tasks [22]. Hence, we similarly defined “collective testosterone” for manakin groups as the  
78 weighted average testosterone phenotype of the individuals comprising each lek social network,  
whereby each male’s contribution was weighted by his social activity (i.e., frequency of  
80 cooperative interactions or “strength”). Because hormone-behavior relationships are status-  
specific [12], collective testosterone was calculated for each of the two status classes separately.  
82 As illustrated in Fig. 1B, this measure ranks social networks on a scale ranging from those made  
up of mostly low-testosterone individuals, to those made up of mostly high-testosterone  
84 individuals.

We evaluated whether collective testosterone was associated with three emergent  
86 properties of social networks. The first property, social specialization, is a measure of the  
exclusivity of the relationships between coalition partners. To quantify specialization at the  
88 network level, we used the  $H_2'$  metric from community ecology, which provides a standardized

90 ranking of bipartite networks on a scale from highly generalized to highly specialized [23]. In the  
91 context of manakin behavior, highly specialized networks exhibit a high frequency of exclusive  
92 partnerships between males of different status classes, as illustrated in Fig. S1. In other species,  
93 social specialization has been found to maximize the quality and coordination of different types  
94 of behaviors [24,25]; in manakins, we expect specialization to improve the signal quality of  
95 male-male courtship displays. Greater specialization is also expected to minimize conflict over  
96 mating and territorial ascension opportunities [26,27].

97 The second property, network stability, quantifies the average persistence of social  
98 partnerships through time [19,28]. Coalition partnerships require the coordination of complex  
99 behaviors, and previous empirical work indicates that longer partnership tenure has a positive  
100 effect on display coordination [29,30]. Greater temporal stability of partnerships also increases  
101 the opportunity for sustained reciprocity within the network [9,10,31]. The third property,  
102 behavioral assortment, captures the extent to which males interact with partners who express  
103 similar behaviors (i.e., is like associated with like? [31,32]). At the proximate level, positive  
104 assortment may represent the outcome of generalized reciprocity [18,33]. At the ultimate level,  
105 positive assortment has also been shown to promote the evolution of cooperation [11]. To  
106 quantify the overall behavioral assortment of the manakin networks, we used a composite  
107 measure that averaged the assortativity of “strength” (a male’s frequency of cooperative  
108 interactions) with that of “degree” (his number of cooperative partnerships) [18]. Examples of  
109 networks illustrating behavioral assortment are also shown in Fig. S1.

110 We found that the collective testosterone of territorial males could predict all three  
111 properties of the social networks. Specifically, the leks with a greater number of high-  
112 testosterone territorial males were less specialized, less stable, and more negatively assorted (Fig.  
113 2; all  $p < 0.03$ ). The coefficients of these relationships were also greater than expected under a  
114 null permutation of the data within each social network (inset panels, Fig. 2; all  $p < 0.015$ ).  
115 Given that testosterone has antagonistic effects on the cooperative behavior of territorial males  
116 [12], we hypothesize that the behavior of high-testosterone individuals causes multiple properties  
117 of stable cooperative networks to break down. In contrast, the collective testosterone of the  
118 floater males did not predict social network properties in our analysis. Therefore, although  
119 testosterone may determine the behavior of both floater and dominant males [12], its effects on  
120 dominant males may represent extended phenotype that ultimately determines social structure  
121 [34].

122 How can the relationship between hormone levels and network properties be explained in  
123 terms of individual behaviors? Based on our results in previous studies [12,19], the high-  
124 testosterone dominant individuals have a reduced ability to attract and maintain stable coalition  
125 partners [12]. This weakening of coalition bonds may cause floater males to prospect elsewhere  
126 for new partnerships, negatively impacting both the overall specialization and stability of the  
127 social network [19]. Likewise, we propose that behavioral assortment becomes more negative in  
128 networks with many high-testosterone individuals, because these individuals may inhibit the  
129 processes of social contagion, reciprocity, and/or behavioral coordination that contribute to  
130 positive assortment [18].

131 To explore the sensitivity of these results to the composition of individuals within the  
132 network [35], we performed a simulation exercise in which we selectively removed males from  
133 their social networks in the observed data, and then repeated our analysis. We set the number of  
134 individuals removed as a constant proportion of the total number of individuals in the network so  
135 that the effect size would be standardized across heterogeneous networks. To evaluate the effect

136 of gradually increasing the amount of social perturbation, the simulation proceeded by removing  
137 less social (i.e., low-strength) individuals first. Although this analysis is not a substitute for  
138 experimental tests *in vivo* [22,36], it can provide a good indication of the importance of  
particular individuals to emergent properties of the network.

139 We found that removing as few as 10% of the males in either social class (dominant  
140 territory-holders or subordinate floaters) eliminated the relationship between stability and  
141 collective testosterone. This indicates that stability is highly sensitive to the presence of both  
142 status classes of males within the network. In contrast, behavioral assortment was more robust to  
143 the removal of individuals: we had to drop 40% of the territory-holders, or 60% of the floaters, to  
144 disrupt its association with testosterone. Finally, the sensitivity of social specialization was also  
145 status-dependent: we found that removing only a few floaters (10%) decoupled the relationship  
146 between specialization and testosterone, whereas 40% of the territorial individuals had to be  
147 removed to eliminate this result. Thus, the behavior of the floater males (i.e., initiating  
148 partnerships) may play a key role in determining social specialization within the network.

149 Conducting experimental tests of causation at the level of whole social networks remains  
150 a major challenge [35,37]. With the present data, we cannot rule out the possibility that high-  
151 testosterone individuals chose to participate in certain networks due to other factors that may also  
152 influence emergent network properties (e.g., environmental quality and/or female activity).  
153 Nevertheless, our data show that the increased prevalence of dominant individuals with high-  
154 testosterone is associated with behavioral dynamics and changes to higher-order social structure  
155 that can ultimately destabilize cooperation. These findings establish that hormone-behavior  
156 relationships are not limited to one individual, but instead they may act as extended group  
157 phenotypes that have population-level consequences [38,39].

### 158 **Acknowledgments**

159 We thank Camilo Alfonso, Brian Evans, David and Consuelo Romo, Kelly Swing, Diego  
160 Mosquera, Gabriela Vinueza, and Tiputini Biodiversity Station of the Universidad San Francisco  
161 de Quito. Funding was provided by the National Science Foundation (NSF) IOS 1353085 and  
162 the Smithsonian Migratory Bird Center.

### 164 **Author Contributions**

165 RD, ITM, BMH, and TBR designed the study.  
166 ITM, BMH, BJV, and TBR collected the data.  
167 RD, ITM, and TBR analyzed the data.  
168 RD and TBR wrote the manuscript. All authors edited the manuscript.

### 170 **Declaration of Interests**

171 The authors declare no competing interests.

174 **Figure Titles and Legends**

176 **Figure 1. Testosterone varies at the level of the social network.** (A) Circulating testosterone  
178 varies within- and among-individuals [12]. This graph shows repeated measures from 210  
180 individual male manakins, sorted along the x-axis by their average testosterone level  
(standardized “mean T”; modified from Ryder et al. [12]). Opacity is used to denote the two  
182 male status classes (with subordinate floaters colored semi-transparent, and dominant territory-  
holders colored opaque) and color ramping is used to denote each individual’s hormone  
184 phenotype. (B-D) Three examples of the social network structure and hormone phenotypes at  
manakin display leks. Each node (circle) represents an individual male who engaged in social  
186 interactions at the lek. Node size is scaled to his interaction frequency (“strength”); this  
parameter is also used to weight each male’s contribution to collective testosterone. Edge  
188 thicknesses are also scaled to the log-transformed interaction frequencies for each observed  
coalition. Node colors indicate an individual’s hormone phenotype following the scale in (A).  
190 The collective testosterone of the social network is calculated as the average of the individual  
hormone phenotypes within the social network, weighted by strength as a measure of each  
192 male’s contribution. Because hormone-mediated cooperation is status-specific [12], collective  
testosterone was determined for each status class separately (indicated by the semi-transparent  
and opaque color scales for floaters and territory-holders, respectively). See Figure S1 for  
additional data.

194  
**Figure 2. Collective testosterone predicts the emergent properties of cooperative social  
196 networks.** Lek social networks with greater representation of high-testosterone territorial  
individuals were less specialized (i.e., partnerships were less exclusive), less stable over time,  
198 and had more negative behavioral assortment (i.e., individuals tended to associate with more  
dissimilar partners). Each plot shows the partial residuals from a statistical analysis that also  
200 accounts for field season, the average Julian date of the recording session, the number of  
recorded hours per territory, and network size (fixed effects), as well as a random effect of lek  
202 identity. Because the two status classes differ in behavior [18], the analysis of behavioral  
assortment also accounted for assortment of the status classes within each network as an  
204 additional covariate. Different symbols are used to indicate repeated measures of 11 different  
leks networks, and colored according the collective testosterone gradient in Figure 1B. Inset  
206 panels show the results of a null randomization test. In each case, the slope in the best-fit model  
(solid vertical line) was significantly more negative than expected in the null permutations of the  
208 social networks (grey distribution; dotted vertical line indicates 0; all p-values < 0.015). See  
Tables S1 and S2 for additional data.

210

STAR Methods (note that the headings and structure follow STAR required format)

212

## Key Resources Table

214

| REAGENT or RESOURCE                                  | SOURCE                                                                                                                 | IDENTIFIER                                 |
|------------------------------------------------------|------------------------------------------------------------------------------------------------------------------------|--------------------------------------------|
| <b>Experimental Models: Organisms/Strains</b>        |                                                                                                                        |                                            |
| <i>Pipra filicauda</i>                               | Tiputini Biodiversity Station; Universidad San Francisco de Quito                                                      | 0° 38' S, 76° 08' W                        |
| <b>Chemicals, Peptides, and Recombinant Proteins</b> |                                                                                                                        |                                            |
| Rabbit Anti-Testosterone-3                           | Fitzgerald Industries International, Inc.                                                                              | CAT# 20R-TRO18w                            |
| <b>Software and Algorithms</b>                       |                                                                                                                        |                                            |
| R 3.5.1                                              | <a href="https://www.r-project.org/">https://www.r-project.org/</a>                                                    | 3.5.1                                      |
| igraph                                               | <a href="https://igraph.org/r/">https://igraph.org/r/</a>                                                              | 1.2.2                                      |
| bipartite                                            | <a href="https://cran.r-project.org/web/packages/bipartite/">https://cran.r-project.org/web/packages/bipartite/</a>    | 2.13                                       |
| assortnet                                            | <a href="https://cran.r-project.org/web/packages/assortnet/">https://cran.r-project.org/web/packages/assortnet/</a>    | 0.12                                       |
| lme4                                                 | <a href="https://cran.r-project.org/web/packages/lme4/">https://cran.r-project.org/web/packages/lme4/</a>              | 1.1-18-1                                   |
| lmerTest                                             | <a href="https://cran.r-project.org/web/packages/lmerTest/">https://cran.r-project.org/web/packages/lmerTest/</a>      | 3.0-1                                      |
| <b>Deposited Data</b>                                |                                                                                                                        |                                            |
| Data and analysis code                               | Available at:<br><a href="https://figshare.com/s/13a311662fee686fa4f3">https://figshare.com/s/13a311662fee686fa4f3</a> | <the DOI will be added upon final version> |

## 216 Contact for Reagent and Resource Sharing

218 Further information and requests for resources should be directed to and will be fulfilled by the Lead Contact, T. Brandt Ryder ([rydert@si.edu](mailto:rydert@si.edu)).

## 220 Experimental Model and Subject Details

### 222 *Study Population*

224 We studied wire-tailed manakins (*Pipra filicauda*) at the Tiputini Biodiversity Station in Orellana Province, Ecuador (0° 38' S, 76° 08' W). This population of *P. filicauda* has been studied and individuals color-banded annually since 2002 [7,8]. Wire-tailed manakins are a long-lived species in which the males form cooperative display coalitions to court females on sites known as leks [16]. There are two male status classes in *P. filicauda*: subordinate non-territorial floater males, and dominant territorial males. Previous research has established that territory ownership is a prerequisite for mating, and that both floaters and territory-holders benefit from

230 cooperative partnerships [7,8]. Specifically, floaters with more social partners are more likely to  
231 inherit a territory, and territory-holders with more partners achieve greater reproductive success  
232 [7,8]. The present study was conducted on 11 leks where the males perform their cooperative  
233 courtship displays during peak breeding activity (December-March) across three field seasons:  
234 2015-16, 2016-17 and 2017-18 [12]. All research was approved by the Smithsonian ACUC  
235 (protocols #12-23, 14-25, and 17-11) and the Ecuadorean Ministry of the Environment (MAE-  
236 DNB-CM-2015-0008).

## 238 **Method Details**

### 240 ***Testosterone Assay***

241 Male manakins were caught at leks using mist-nets up to three times per field season. Following  
242 capture and removal from the mist net, a small blood sample (< 125uL) was taken from the  
243 brachial vein and stored on ice prior to being centrifuged at 10,000 rpm for 5 min, as described in  
244 [12,21,40]. Plasma volume was measured to the nearest 0.25 ul and stored in 0.75 ml of 100%  
245 ethanol [41]. Plasma testosterone was double extracted using dichloromethane. Following  
246 extraction, direct radioimmunoassay was used to measure the total plasma androgen  
247 concentration (ng/ml) adjusted by the extraction efficiency and plasma volume of each sample  
248 [21,42]. Hormone assays were conducted annually, and the detection limits were 0.12, 0.08, and  
249 0.09 ng/ml for 2015-16, 2016-17 and 2017-18, respectively; any sample that fell below the  
250 assay-specific limit of detection was assigned that limit as its testosterone concentration as a  
251 most conservative estimate. As reported in our previous study [12], the extraction efficiency for  
252 all samples was between 62-73%, and the intra-assay coefficients of variation were 6.6%, 11.6%,  
253 and 9.2% for 2015-16, 2016-17 and 2017-18, respectively; the inter-assay coefficient of variation  
254 was 19.5%.

### 256 ***Behavioral Assay***

257 To quantify social behaviors, we used an automated proximity data-logging system to monitor  
258 the activity on the territories of 11 leks [12,18,43]. At the beginning of each field season, males  
259 were outfitted with a coded nano-tag (NTQB-2, Lotek Wireless; 0.35 g). The tags transmitted a  
260 unique VHF signal ping once per 20 s for three months. In total, 296 tag deployments were  
261 performed on 180 individual males, 178 of whom also had hormone data (mean 3 hormone  
262 samples per male  $\pm$  SD 1.5). Approximately 10 days ( $\pm$  SD 7) after tagging and sampling was  
263 completed at a given lek, a proximity data-logger (SRX-DL800, Lotek Wireless) was deployed  
264 within each territory to record tagged males within a detection radius of 30 m (a distance that  
265 corresponds to the average diameter of a manakin display territory [16,18]). Proximity recording  
266 sessions ran from 06:00 to 16:00 for  $\sim$ 6 consecutive days ( $\pm$  SD 1 day) and were performed  $\sim$ 3  
267 times per season at each lek. Prior to data-logger deployment, each territory was also observed  
268 on non-recording days to identify the territory-holder based on his color-bands, following the  
269 protocol in previous studies [7,8]. These status assignments were subsequently verified in the  
270 proximity data. In total, we conducted 86 recording sessions (29,760 data-logger hours)  
271 representing repeated measures of the social activity at 11 different leks.

272 To quantify social interactions in the proximity data, the tag detections were filtered  
273 using an spatiotemporal algorithm to identify unique joint detections, when two males were  
274 located within a display territory [7,43,18]. A detailed description of the algorithm is provided in  
[18]. A ground-truthing experiment in that study also confirmed that these joint detections

276 represent occasions when two males were < 5 m apart [18], corresponding to the range required  
277 for a typical male-male social display [16]. An additional validation study also confirmed that  
278 the social interactions defined by this method corresponded to display coalitions that were  
279 directly observed [43]. In total, we identified 36,885 unique social interactions over the three  
280 field seasons in this study.

## 282 **Quantification and Statistical Analysis**

All quantitative analyses were performed in R [44].

284

### *Network Analysis*

286 We used the igraph package [45] to construct a weighted social network for each lek recording  
287 session. The individual males who interacted on the lek were defined as the nodes, and the links  
288 (or edges) between them were weighted by the social interaction frequencies. We quantified  
289 three emergent network properties for each lek recording session: social specialization, network  
290 stability, and behavioral assortment, as described below.

292 For specialization, we sought a measure that would capture the extent to which a network  
293 was partitioned into exclusive social relationships (as opposed to a network made up of non-  
294 specific or non-exclusive partnerships). To do this, we used a network metric of specialization  
295 that is commonly used in community ecology to analyze ecological networks, called  $H_2'$  [23].  
296 An advantage of  $H_2'$  is that it is standardized against a theoretical maximum, based on the  
297 overall activity levels of different nodes and Shannon entropy [23]; this makes it possible to  
298 compare the extent of specialization across different bipartite networks in a standardized way. To  
299 apply this metric to our manakin data, we converted each lek social network into its bipartite  
300 adjacency matrix, with floaters along one axis, and territory-holders on the other, and then  
301 calculated social specialization as  $H_2'$  using the bipartite package [46]. Higher values of this  
302 metric indicate that the network is made up of more exclusive relationships, as illustrated in Fig.  
303 S1. We chose to focus on floater-territorial specialization because these are by far the most  
304 common partnerships in this social system with reproductive benefits to both parties [17].

306 To quantify the stability of social relationships, we compared each lek social network  
307 derived from one recording session to that derived from the subsequent recording session within  
308 the same field season (if available). Network stability was then calculated as the number of male-  
309 male partnerships (network edges) shared by both time points divided by the number of  
310 partnerships at either time point (i.e., the intersection divided by the union [19]). Higher values  
311 of stability indicate greater persistence of social relationships within the network, independent of  
312 any changes in the representation of particular males (nodes) [28]. To reduce the influence of  
313 partnerships that occurred only rarely [47], prior to the stability calculation we filtered the data to  
314 include only significant edges that occurred more often than expected in 1,000 random  
315 permutations of the interaction data, and at least six times during a recording session (i.e., on  
316 average, once per day). Our previous work has established that network stability is robust to  
317 alternative thresholds for occurrence and that the wire-tailed manakin networks are more stable  
318 than expected by chance [19].

319 Assortment refers to the extent to which individuals associate with similar partners; it can  
320 be due to partner choice (homophily), shared environments, or the social transmission of  
321 behavior [18]. Assortment was quantified using Newman's assortativity, which is a correlation  
322 coefficient for the statistical association among linked nodes within a network. It ranges from -1  
(a negative association), through 0 (no association), and up to +1 (a positive association). To



322 quantify the assortment of cooperative behaviors, we first determined the daily frequency of two  
324 behaviors for each male: his number of social interactions (strength), and his number of unique  
326 social partnerships (degree) per day [18]. Strength and degree are both repeatable measures of a  
328 male's cooperative behavior in our study population [18]. Next, we computed the average log-  
330 transformed strength and degree within the recording session for each individual, and then  
332 calculated a weighted assortativity coefficient for the entire social network using the assortnet  
package [48]. Because assortativity values for strength and degree were highly correlated  
(Pearson's  $r = 0.78$ ,  $p < 0.0001$ ,  $n = 86$ ), we took the average of these two values as the measure  
of overall behavioral assortment within the social network. Finally, we also computed the  
assortativity of the two discrete status classes, to ensure that our analysis of behavioral  
assortment was not solely driven by status-specific patterns of assortment.

### 334 *Statistical Models*

Following our previous study [12], we characterized each male's average circulating testosterone  
336 after statistically accounting for capture conditions ("mean T" in [12]), including the time of day  
and duration of time the bird was in the mist-net [40]. This measure of among-individual  
338 testosterone variation was a significant predictor of cooperative behavior in our study system,  
albeit with different relationships within each status class [12]. To quantify collective  
340 testosterone, we took the average "mean T" within the social network, weighted by each male's  
interaction frequency (strength) as a measure of his contribution to the network. We calculated  
342 collective testosterone separately for each status class because the effects of hormones on social  
behavior are status-dependent in this and other species [5,12,20].

344 To evaluate whether collective testosterone could explain emergent social network  
properties, we fit mixed-effects models using the packages lme4 and lmerTest [49,50]. Each  
346 model was fit with a random effect of lek to account for repeated measures ( $n = 86$  measures of  
11 leks, except for stability which had  $n = 60$  because stability requires a subsequent recording  
348 session). We used Akaike's Information Criterion to compare goodness-of-fit for four candidate  
models, as follows: (1) collective testosterone of territory-holders + collective testosterone of  
350 floaters; (2) collective testosterone of territory-holders; (3) collective testosterone of floaters, and  
(4) no testosterone predictors. All of the candidate models also included additional fixed effects  
352 to account for field season (a categorical variable with three levels), the average Julian date of  
the recording session, the number of recorded hours per territory, and the size of the social  
354 network (number of individuals). Continuous predictors were standardized (mean = 1, SD = 1)  
prior to being entered into the analysis so that the slope estimates would be comparable with  
356 other models. Model selection was performed on models fit with maximum likelihood, and then  
the best-fit models were refit using restricted estimation of maximum likelihood (REML) to  
358 determine p-values [51]. We used the lmerTest package to compute p-values for generalized  
mixed-effects models based on Satterthwaite's method.

360 In two field seasons (2016-17 and 2017-18), nine of the territory-holders were part of an  
experiment testing the influence of transiently-elevated testosterone on individual behavior ( $n =$   
362 5 individuals in 2016-17 and  $n = 4$  in 2017-18 [12]). The results of that experiment demonstrated  
that elevated testosterone caused a temporary decrease in the frequency and the number of  
364 cooperative partnerships in the altered males, relative to control males [12]. However, it is  
important to note that this experiment was not designed to test effects at the collective level,  
366 because it was conducted on a limited scale whereby only one or two individuals were  
temporarily altered in only four leks. Therefore, our main analysis here excluded data from

368 recording sessions at manipulated leks. However, we verified that when we repeated our  
370 analyses including these manipulated leks, the main conclusions were unchanged. Furthermore,  
372 we did not detect any statistically significant effect of the individual hormone manipulation on  
the three network-level properties (i.e., specialization, stability, and assortment; all  $p > 0.16$ ).  
374 Finally and most importantly, controlling for the manipulation also did not affect any of our  
conclusions about collective testosterone shown in Fig. 2

### 374 ***Randomization Test***

376 We performed a randomization test using a null model [47] to assess the effect of randomizing  
each social network, leaving the testosterone data unchanged. To generate the null data, we  
378 randomly permuted the node labels (ID labels) within each of the 86 social networks, retaining  
all other features of the social network. After generating each null dataset, we recalculated the  
380 network-level properties (specialization, stability, and assortment), and then refit the top models  
from our original analysis. We then compared the slope estimates from the observed data to the  
382 values obtained from 1,000 of these null permutations.

### 384 ***Perturbation Analysis***

We performed a social perturbation analysis to determine the sensitivity of our results to the  
386 composition of the social network [35]. To do this, we performed six iterations removing an  
increasing number of either floater or territory-holding males with each iteration (node removal  
388 iterations = 10%, 20%, 30%, 40%, 50%, and 60% of the individuals in the relevant status class).  
The number of individuals removed from each network was rounded, such that it was at least  
390 one, but not all of the individuals from that status class. To perform the removals, the males were  
sorted by strength, and low-strength individuals were removed first. After severing all social ties  
392 of the removed individuals, we recalculated the network properties, and refit the top models from  
our original analysis (Table S1). Then, we compared the beta coefficients for collective  
394 testosterone (standardized slope estimates) to those derived from the original data. A result was  
considered robust to perturbation if two criteria were met: the slope in the removal analysis was  
396 significantly different from 0, and it was within the 95% confidence interval of the slope from  
the original data.

### 398 **Data and Software Availability**

400 All data and R scripts necessary to reproduce this study are available for download at:  
<https://figshare.com/s/13a311662fee686fa4f3>

### 402 **Supplemental Information**

404 Figure S1 and Table S1-S2 in attached PDF

406

## References

- 408 1. Wingfield, J.C., Hegner, R.E., Dufty, Alfred M., and Ball, G.F. (1990). The “challenge  
410 hypothesis”: theoretical implications for patterns of testosterone secretion, mating  
systems, and breeding strategies. *The American Naturalist* 136, 829–846.
- 412 2. Oyegbile, T.O., and Marler, C.A. (2005). Winning fights elevates testosterone levels in  
California mice and enhances future ability to win fights. *Hormones and Behavior* 48, 259–  
267.
- 414 3. Goymann, W. (2009). Social modulation of androgens in male birds. *General and  
Comparative Endocrinology* 163, 149–157.
- 416 4. Fuxjager, M.J., Forbes-Lorman, R.M., Coss, D.J., Auger, C.J., Auger, A.P., and Marler, C.A.  
418 (2010). Winning territorial disputes selectively enhances androgen sensitivity in neural  
pathways related to motivation and social aggression. *PNAS* 107, 12393–12398.
- 420 5. Eisenegger, C., Haushofer, J., and Fehr, E. (2011). The role of testosterone in social  
interaction. *Trends in Cognitive Sciences* 15, 263–271.
- 422 6. Sumpter, D.J.T. (2010). *Collective Animal Behavior* (Princeton University Press).
- 424 7. Ryder, T.B., McDonald, D.B., Blake, J.G., Parker, P.G., and Loiselle, B.A. (2008). Social  
networks in the lek-mating wire-tailed manakin (*Pipra filicauda*). *Proceedings of the Royal  
Society B* 275, 1367–1374.
- 426 8. Ryder, T.B., Parker, P.G., Blake, J.G., and Loiselle, B.A. (2009). It takes two to tango:  
reproductive skew and social correlates of male mating success in a lek-breeding bird.  
*Proceedings of the Royal Society B* 276, 2377–2384.
- 428 9. Trivers, R.L. (1971). The evolution of reciprocal altruism. *The Quarterly Review of Biology*  
46, 35–57.
- 430 10. Roberts, G., and Sherratt, T.N. (1998). Development of cooperative relationships through  
increasing investment. *Nature* 394, 175.
- 432 11. Ohtsuki, H., Hauert, C., Lieberman, E., and Nowak, M.A. (2006). A simple rule for the  
evolution of cooperation on graphs and social networks. *Nature* 441, 502–505.
- 434 12. Ryder, T.B., Roslyn Dakin, Vernasco, B.J., Horton, B.M., and Moore, I.T. (In press).  
Testosterone modulates status-specific patterns of cooperation in a social network.  
436 Preprint. <https://doi.org/10.1101/453548>. *American Naturalist*. Available at:  
<https://doi.org/10.1101/453548>.
- 438 13. Adkins-Regan, E. (2005). *Hormones and animal social behavior* (Princeton University Press).

- 440 14. Cohen, A.A., Martin, L.B., Wingfield, J.C., McWilliams, S.R., and Dunne, J.A. (2012).  
Physiological regulatory networks: ecological roles and evolutionary constraints. *Trends in Ecology & Evolution* 27, 428–435.
- 442 15. Krause, J., and Ruxton, G.D. (2002). *Living in Groups* (OUP Oxford).
- 444 16. Heindl, M. (2002). Social organization on leks of the wire-tailed manakin in southern  
venezuela. *The Condor* 104, 772–779.
- 446 17. Ryder, T.B., Blake, J.G., Parker, P.G., and Loiselle, B.A. (2011). The composition, stability, and  
kinship of reproductive coalitions in a lekking bird. *Behav Ecol* 22, 282–290.
- 448 18. Dakin, R., and Ryder, T.B. (2018). Dynamic network partnerships and social contagion drive  
cooperation. *Proceedings of the Royal Society B: Biological Sciences* 285, 20181973.
- 450 19. Dakin, R., and Ryder, T.B. (preprint in review). Reciprocity and behavioral heterogeneity  
govern the stability of social networks. Preprint. <https://doi.org/10.1101/694166>. preprint  
in review. Available at: <https://doi.org/10.1101/694166>.
- 452 20. Boksem, M.A.S., Mehta, P.H., Van den Bergh, B., van Son, V., Trautmann, S.T., Roelofs, K.,  
Smidts, A., and Sanfey, A.G. (2013). Testosterone Inhibits trust but promotes reciprocity.  
454 *Psychol Sci* 24, 2306–2314.
- 456 21. Ryder, T.B., Horton, B.M., and Moore, I.T. (2011). Understanding testosterone variation in a  
tropical lek-breeding bird. *Biology Letters* 7, 506–509.
- 458 22. Akinola, M., Page-Gould, E., Mehta, P.H., and Lu, J.G. (2016). Collective hormonal profiles  
predict group performance. *PNAS* 113, 9774–9779.
- 460 23. Blüthgen, N., Menzel, F., and Blüthgen, N. (2006). Measuring specialization in species  
interaction networks. *BMC Ecology* 6, 9.
- 462 24. Jehn, K.A., and Shah, P.P. (1997). Interpersonal relationships and task performance: an  
examination of mediation processes in friendship and acquaintance groups. *Journal of  
Personality and Social Psychology* 72, 775–790.
- 464 25. Laskowski, K.L., Montiglio, P.-O., and Pruitt, J.N. (2016). Individual and group performance  
suffers from social niche disruption. *The American Naturalist* 187, 776–785.
- 466 26. Schjelderup-Ebbe, T. (1922). Beiträge zur sozialpsychologie des haushuhns. [Observation on  
the social psychology of domestic fowls.]. *Zeitschrift für Psychologie und Physiologie der  
468 Sinnesorgane. Abt. 1. Zeitschrift für Psychologie* 88, 225–252.
- 470 27. McDonald, D.B. (1993). Delayed plumage maturation and orderly queues for status: a  
manakin mannequin experiment. *Ethology* 94, 31–45.

- 472 28. Poisot, T., Canard, E., Mouillot, D., Mouquet, N., and Gravel, D. (2012). The dissimilarity of species interaction networks. *Ecology Letters* *15*, 1353–1361.
- 474 29. Trainer, J.M., and McDonald, D.B. (1995). Singing performance, frequency matching and courtship success of long-tailed manakins (*Chiroxiphia linearis*). *Behav Ecol Sociobiol* *37*, 249–254.
- 476 30. Trainer, J.M., McDonald, D.B., and Learn, W.A. (2002). The development of coordinated singing in cooperatively displaying long-tailed manakins. *Behav Ecol* *13*, 65–69.
- 478 31. Croft, D.P., James, R., Thomas, P.O.R., Hathaway, C., Mawdsley, D., Laland, K.N., and Krause, J. (2006). Social structure and co-operative interactions in a wild population of guppies  
480 (*Poecilia reticulata*). *Behav Ecol Sociobiol* *59*, 644–650.
- 482 32. Farine, D.R. (2014). Measuring phenotypic assortment in animal social networks: weighted associations are more robust than binary edges. *Animal Behaviour* *89*, 141–153.
- 484 33. Fowler, J.H., and Christakis, N.A. (2010). Cooperative behavior cascades in human social networks. *PNAS* *107*, 5334–5338.
- 486 34. Dawkins, R. (1982). *The Extended Phenotype: The Gene as the Unit of Selection* (San Francisco: W. H. Freeman and Company).
- 488 35. Pinter-Wollman, N., Hobson, E.A., Smith, J.E., Edelman, A.J., Shizuka, D., de Silva, S., Waters, J.S., Prager, S.D., Sasaki, T., Wittemyer, G., *et al.* (2014). The dynamics of animal social networks: analytical, conceptual, and theoretical advances. *Behav Ecol* *25*, 242–255.
- 490 36. Zyphur, M.J., Narayanan, J., Koh, G., and Koh, D. (2009). Testosterone–status mismatch lowers collective efficacy in groups: evidence from a slope-as-predictor multilevel structural  
492 equation model. *Organizational Behavior and Human Decision Processes* *110*, 70–79.
- 494 37. James, R., Croft, D.P., and Krause, J. (2009). Potential banana skins in animal social network analysis. *Behav Ecol Sociobiol* *63*, 989–997.
- 496 38. McClintock, M.K. (1981). Social control of the ovarian cycle and the function of estrous synchrony. *Integr Comp Biol* *21*, 243–256.
- 498 39. Robinson, G.E. (1992). Regulation of division of labor in insect societies. *Annual Review of Entomology* *37*, 637–665.
- 500 40. Vernasco, B.J., Horton, B.M., Ryder, T.B., and Moore, I.T. (2019). Sampling baseline androgens in free-living passerines: Methodological considerations and solutions. *General and Comparative Endocrinology* *273*, 202–208.

- 502 41. Goymann, W., Schwabl, I., Trappschuh, M., and Hau, M. (2007). Use of ethanol for  
504 preserving steroid and indoleamine hormones in bird plasma. *General and Comparative  
Endocrinology* 150, 191–195.
- 506 42. Eikenaar, C., Whitham, M., Komdeur, J., van der Velde, M., and Moore, I.T. (2011).  
Endogenous testosterone is not associated with the trade-off between paternal and mating  
effort. *Behav Ecol* 22, 601–608.
- 508 43. Ryder, T.B., Horton, B.M., Tillaart, M. van den, Morales, J.D.D., and Moore, I.T. (2012).  
510 Proximity data-loggers increase the quantity and quality of social network data. *Biology  
Letters* 8, 917–920.
- 512 44. R Core Team (2018). R 3.5.1: A Language and Environment for Statistical Computing  
(Vienna, Austria: R Foundation for Statistical Computing) Available at: [https://www.R-  
project.org](https://www.R-project.org).
- 514 45. Csardi, G., and coauthors (2018). igraph 1.2.2: network analysis and visualization. Available  
at: <https://cran.r-project.org/web/packages/igraph/index.html>.
- 516 46. Dormann, C.F., Fruend, J., and Gruber, B. (2019). bipartite 2.13: visualising bipartite  
518 networks and calculating some (ecological) indices Available at: [https://cran.r-  
project.org/web/packages/bipartite](https://cran.r-project.org/web/packages/bipartite).
- 520 47. Farine, D.R., Freckleton, R., and Rands, S. (2017). A guide to null models for animal social  
network analysis. *Methods in Ecology and Evolution* 8, 1309–1320.
- 522 48. Farine, D.R. (2016). assortnet 0.12: calculate the assortativity coefficient of weighted and  
binary networks Available at: [https://cran.r-  
project.org/web/packages/assortnet/index.html](https://cran.r-project.org/web/packages/assortnet/index.html).
- 524 49. Bates, D., Maechler, M., Bolker, B., Walker, S., Christensen, R.H.B., Singmann, H., Dai, B.,  
526 Scheipl, F., Grothendieck, G., and Green, P. (2018). lme4 1.1-18-1: linear mixed-effects  
models using “Eigen” and S4 Available at: [https://cran.r-  
project.org/web/packages/lme4/index.html](https://cran.r-project.org/web/packages/lme4/index.html).
- 528 50. Kuznetsova, A., Brockhoff, P.B., and Christensen, R.H.B. (2018). lmerTest 3.0-1: tests in  
530 linear mixed effects models Available at: [https://cran.r-  
project.org/web/packages/lmerTest/index.html](https://cran.r-project.org/web/packages/lmerTest/index.html).
- 532 51. Zuur, A., Ieno, E.N., Walker, N., Saveliev, A.A., and Smith, G.M. (2009). *Mixed effects models  
and extensions in ecology with R* (Springer Science & Business Media).

Figure 1

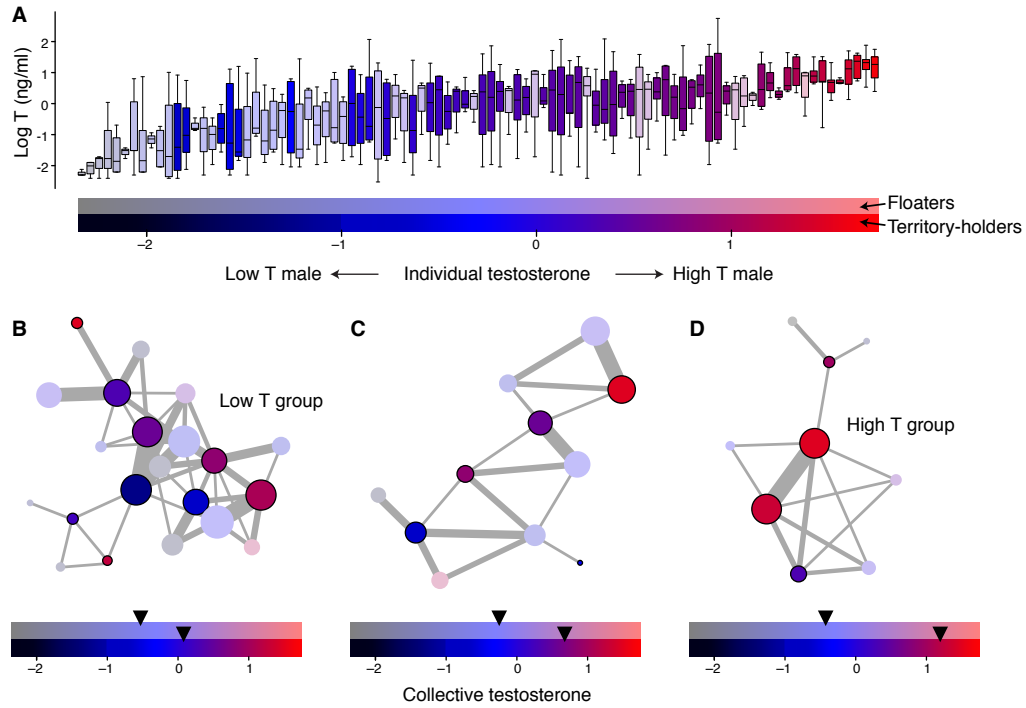

Figure 2

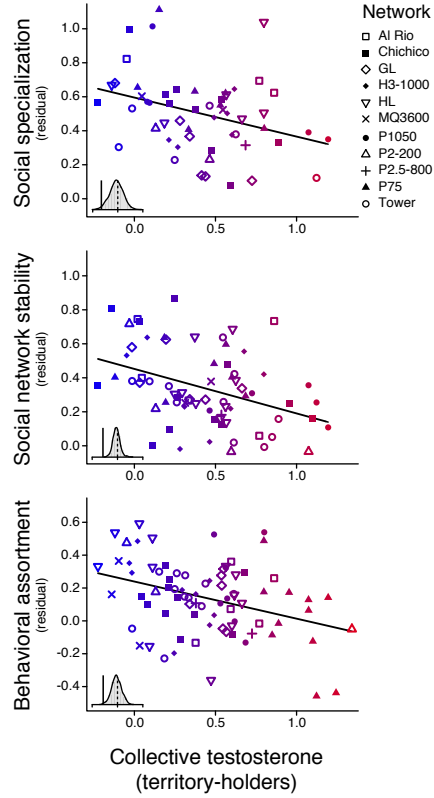

Source: https://www.biorxiv.org/content/10.1101/737650v1.full.pdf
