2 **Testosterone-mediated behavior shapes the emergent properties of social**  
3 **networks**

4 Roslyn Dakin<sup>1,2</sup>, Ignacio T. Moore<sup>3</sup>, Brent M. Horton<sup>4</sup>, Ben J. Vernasco<sup>3</sup>, T. Brandt Ryder<sup>1,5</sup>

6 <sup>1</sup>Migratory Bird Center, Smithsonian Conservation Biology Institute, National Zoological Park,  
Washington, DC 20013, USA

8 <sup>2</sup>Current address: Department of Biology, Carleton University, Ottawa, Ontario K1S 5B6,  
Canada

10 <sup>3</sup>Department of Biological Sciences, Virginia Tech, Blacksburg, Virginia 24061, USA

<sup>4</sup>Department of Biology, Millersville University, Millersville, Pennsylvania 17551, USA

12 <sup>5</sup>Current address: Bird Conservancy of the Rockies, Fort Collins, Colorado, 80525, USA

14 Correspondence: [rydert@si.edu](mailto:rydert@si.edu)

## 16 **Abstract**

1. Testosterone is a key regulator of vertebrate social behavior. As such, testosterone can  
18 mediate and respond to social interaction dynamics.
2. Although experiments have demonstrated that testosterone signaling pathways can  
20 influence aggression and cooperation, no study has examined the links between hormone  
22 levels, behavioral phenotypes, and emergent properties of the social network. In other  
24 words, how do mechanisms underlying an individual's social behavior scale-up to  
26 influence the emergent properties of the social network?
3. Here, we address this question by studying wire-tailed manakins, a species of bird in  
28 which males cooperate to court females at sites known as leks. Our previous experiments  
30 established that testosterone can influence the social behavior of individual male  
32 manakins. In the present study, we use an automated proximity system to monitor  
34 multiple manakin leks and measure the social network at each lek repeatedly through  
36 time. We also quantified the testosterone phenotype of all individuals in the lek.
4. Our analysis examines how the collective hormone phenotype of individuals within the  
lek affects three emergent properties of the social network: social specialization (the  
exclusivity of social relationships), network stability (the persistence of partnerships  
through time), and behavioral assortment (like associating with like). These three  
properties are expected to enhance the benefits of cooperation. We found that the  
manakin social networks with high-testosterone, dominant individuals were less  
specialized, less stable, and had more negative behavioral assortment.

5. These results provide evidence that hormones can act as an extended phenotype that  
38 shapes the broader social architecture of animal groups. High-testosterone groups exhibit  
collective behaviors that are predicted to impede the evolution of cooperation.

40

**Keywords:** androgens, behavioral endocrinology, collective behavior, cooperation, dynamic  
42 networks, social networks, testosterone

## Introduction

44 Testosterone signalling pathways can both mediate and respond to dynamic social environments  
in a diversity of vertebrates (Wingfield *et al.* 1990; Oyegbile & Marler 2005; Adkins-Regan  
46 2005; Goymann 2009; Fuxjager *et al.* 2010; Eisenegger *et al.* 2011). For example, hormone-  
signaling pathways at the level of the individual are essential for the development and expression  
48 of complex behavioral phenotypes (Cohen *et al.* 2012), which are hypothesized to shape social  
interaction dynamics and higher order social network structure. Testing this hypothesis is  
50 challenging, because it requires linking fine-scale measures of behavior and physiology with  
broad-scale measurements that characterize the collective behavior of the group (Krause &  
52 Ruxton 2002).

Here, we leverage a large and comprehensive dataset on the circulating hormone levels,  
54 behavioral phenotypes, and social networks of a cooperative bird, the wire-tailed manakin (*Pipra  
flicauda*), to test the hypothesis that testosterone-mediated behavior drives emergent social  
56 structure. Male wire-tailed manakins form cooperative display coalitions on sites known as leks  
to attract females (Heindl 2002). These coalition partnerships are essential for male fitness  
58 (Ryder *et al.* 2008, 2009) and form the basis of complex and dynamic social networks (Ryder *et  
al.* 2008, 2011a; Dakin & Ryder 2018). The social networks of wire-tailed manakins can also  
60 exhibit temporal variation in structure (Dakin & Ryder preprint in review). This is important  
because the emergent properties of the social network are theoretically predicted to influence the  
62 costs and benefits of cooperation, and hence shape selection on individual behavior. For  
example, cooperation in social networks is favored when individuals interact with a limited set of  
64 familiar partners, when these relationships are temporally stable, and when helping is

reciprocated by immediate neighbors in the group (Trivers 1971; Roberts & Sherratt 1998;  
66 Ohtsuki *et al.* 2006).

Can hormone-phenotypes at the individual level scale-up to influence these processes?

68 We have previously shown that male manakins differ in their circulating testosterone levels, with  
some individuals have consistently higher testosterone than others (Fig. 1A). Moreover, variation  
70 in testosterone level can also explain repeatable, among-individual differences in the frequency  
and number of social partnerships (Ryder *et al.* in press). As observed in other vertebrates  
72 (Eisenegger *et al.* 2011; Boksem *et al.* 2013), these hormone-behavior relationships are status-  
specific in wire-tailed manakins. Among dominant, territory-holding males, high testosterone  
74 levels are associated with reduced cooperative behavior (Ryder *et al.* in press). However, in the  
subordinate, “floater” males, high testosterone is associated with increased cooperative behavior  
76 and subsequent territory acquisition (Ryder *et al.* in press), both of which are essential for  
reproductive fitness (Ryder *et al.* 2008, 2011b).

78 In this study, we used an automated proximity data-logging system to record over 36,000  
unique male-male social interactions. These data allowed us to analyze repeated measures of the  
80 weighted social networks at 11 different leks where manakin coalitions occur. A recent study  
showed that the collective hormonal profile of human social groups can predict group success at  
82 social tasks (Akinola *et al.* 2016). Hence, we similarly defined “collective testosterone” for  
manakin groups as the weighted average testosterone phenotype of the individuals comprising  
84 each lek social network, whereby each male’s contribution was weighted by his social activity  
(i.e., frequency of cooperative interactions or “strength”). Because hormone-behavior  
86 relationships are status-specific (Ryder *et al.* in press), collective testosterone was calculated for  
each of the two status classes separately. As illustrated in Fig. 1B, this measure ranks social

88 networks on a scale ranging from those made up of mostly low-testosterone individuals, to those  
made up of mostly high-testosterone individuals.

90 We evaluated whether collective testosterone was associated with three emergent  
properties of social networks. The first property, social specialization, is a measure of the  
92 exclusivity of the relationships between coalition partners. To quantify specialization at the  
network level, we used the  $H_2'$  metric from community ecology, which provides a standardized  
94 ranking of bipartite networks on a scale from highly generalized to highly specialized (Blüthgen  
*et al.* 2006). In the context of manakin behavior, highly specialized networks exhibit a high  
96 frequency of exclusive partnerships between males of different status classes, as illustrated in  
Fig. S1. In other species, social specialization has been found to maximize the quality and  
98 coordination of different types of behaviors (Jehn & Shah 1997; Laskowski *et al.* 2016); in  
manakins, we expect specialization to improve the signal quality of male-male courtship  
100 displays. Greater specialization is also expected to minimize conflict over mating and territorial  
ascension opportunities (Schjelderup-Ebbe 1922; McDonald 1993).

102 The second property, network stability, quantifies the average persistence of social  
partnerships through time (Dakin & Ryder preprint in review; Poisot *et al.* 2012). Coalition  
104 partnerships require the coordination of complex behaviors, and previous empirical work  
indicates that longer partnership tenure has a positive effect on display coordination (Trainer &  
106 McDonald 1995; Trainer *et al.* 2002). Greater temporal stability of partnerships also increases  
the opportunity for sustained reciprocity within the network (Trivers 1971; Roberts & Sherratt  
108 1998; Croft *et al.* 2006). The third property, behavioral assortment, captures the extent to which  
males interact with partners who express similar behaviors (i.e., is like associated with like?  
110 (Croft *et al.* 2006; Farine 2014)). At the proximate level, positive assortment may represent the

outcome of generalized reciprocity (Fowler & Christakis 2010; Dakin & Ryder 2018). At the  
112 ultimate level, positive assortment has also been shown to promote the evolution of cooperation  
(Ohtsuki *et al.* 2006). To quantify the overall behavioral assortment of the manakin networks, we  
114 used a composite measure that averaged the assortativity of “strength” (a male’s frequency of  
cooperative interactions) with that of “degree” (his number of cooperative partnerships) (Dakin  
116 & Ryder 2018). Examples of networks illustrating behavioral assortment are also shown in Fig.  
S1.

118

## Materials and Methods

### 120 *Study Population*

We studied wire-tailed manakins (*Pipra filicauda*) at the Tiputini Biodiversity Station in  
122 Orellana Province, Ecuador (0° 38’ S, 76° 08’ W). This population of *P. filicauda* has been  
studied and individuals color-banded annually since 2002 (Ryder *et al.* 2008, 2009). Wire-tailed  
124 manakins are a long-lived species in which the males form cooperative display coalitions to court  
females on sites known as leks (Heindl 2002). There are two male status classes in *P. filicauda*:  
126 subordinate non-territorial floater males, and dominant territorial males. Previous research has  
established that territory ownership is a prerequisite for mating, and that both floaters and  
128 territory-holders benefit from cooperative partnerships (Ryder *et al.* 2008, 2009). Specifically,  
floaters with more social partners are more likely to inherit a territory, and territory-holders with  
130 more partners achieve greater reproductive success (Ryder *et al.* 2008, 2009). The present study  
was conducted on 11 leks where the males perform their cooperative courtship displays during  
132 peak breeding activity (December-March) across three field seasons: 2015-16, 2016-17 and  
2017-18 (Ryder *et al.* in press). All research was approved by the Smithsonian ACUC (protocols

134 #12-23, 14-25, and 17-11) and the Ecuadorean Ministry of the Environment (MAE-DNB-CM-  
2015-0008).

136

### ***Testosterone Assay***

138 Male manakins were caught at leks using mist-nets up to three times per field season. Following  
capture and removal from the mist net, a small blood sample (< 125uL) was taken from the  
140 brachial vein and stored on ice prior to being centrifuged at 10,000 rpm for 5 min, as described in  
(Ryder *et al.* 2011b; Vernasco *et al.* 2019; Ryder *et al.* in press). Plasma volume was measured  
142 to the nearest 0.25 ul and stored in 0.75 ml of 100% ethanol (Goymann *et al.* 2007). Plasma  
testosterone was double extracted using dichloromethane. Following extraction, direct  
144 radioimmunoassay was used to measure the total plasma androgen concentration (ng/ml)  
adjusted by the extraction efficiency and plasma volume of each sample (Eikenaar *et al.* 2011;  
146 Ryder *et al.* 2011b). Hormone assays were conducted annually, and the detection limits were  
0.12, 0.08, and 0.09 ng/ml for 2015-16, 2016-17 and 2017-18, respectively; any sample that fell  
148 below the assay-specific limit of detection was assigned that limit as its testosterone  
concentration as a most conservative estimate. As reported in our previous study (Ryder *et al.* in  
150 press), the extraction efficiency for all samples was between 62-73%, and the intra-assay  
coefficients of variation were 6.6%, 11.6%, and 9.2% for 2015-16, 2016-17 and 2017-18,  
152 respectively; the inter-assay coefficient of variation was 19.5%.

### ***Behavioral Assay***

To quantify social behaviors, we used an automated proximity data-logging system to monitor  
156 the activity on the territories of 11 leks (Ryder *et al.* 2012; Dakin & Ryder 2018; Ryder *et al.* in



press). At the beginning of each field season, males were outfitted with a coded nano-tag  
158 (NTQB-2, Lotek Wireless; 0.35 g). The tags transmitted a unique VHF signal ping once per 20 s  
for three months. In total, 296 tag deployments were performed on 180 individual males, 178 of  
160 whom also had hormone data (mean 3 hormone samples per male  $\pm$  SD 1.5). Approximately 10  
days ( $\pm$  SD 7) after tagging and sampling was completed at a given lek, a proximity data-logger  
162 (SRX-DL800, Lotek Wireless) was deployed within each territory to record tagged males within  
a detection radius of 30 m (a distance that corresponds to the average diameter of a manakin  
164 display territory (Heindl 2002; Dakin & Ryder 2018)). Proximity recording sessions ran from  
06:00 to 16:00 for ~6 consecutive days ( $\pm$  SD 1 day) and were performed ~3 times per season at  
166 each lek. Prior to data-logger deployment, each territory was also observed on non-recording  
days to identify the territory-holder based on his color-bands, following the protocol in previous  
168 studies (Ryder *et al.* 2008, 2009). These status assignments were subsequently verified in the  
proximity data. In total, we conducted 86 recording sessions (29,760 data-logger hours)  
170 representing repeated measures of the social activity at 11 different leks.

To quantify social interactions in the proximity data, the tag detections were filtered  
172 using an spatiotemporal algorithm to identify unique joint detections, when two males were  
located within a display territory (Ryder *et al.* 2008, 2012; Dakin & Ryder 2018). A detailed  
174 description of the algorithm is provided in (Dakin & Ryder 2018). A ground-truthing experiment  
in that study also confirmed that these joint detections represent occasions when two males were  
176  $< 5$  m apart (Dakin & Ryder 2018), corresponding to the range required for a typical male-male  
social display (Heindl 2002). An additional validation study also confirmed that the social  
178 interactions defined by this method corresponded to display coalitions that were directly

observed (Ryder *et al.* 2012). In total, we identified 36,885 unique social interactions over the  
180 three field seasons in this study.

## 182 *Quantification and Statistical Analysis*

All quantitative analyses were performed in R (R Core Team 2018).

184

### *Network Analysis*

186 We used the igraph package (Csardi & coauthors 2018) to construct a weighted social network for  
each lek recording session. The individual males who interacted on the lek were defined as the  
188 nodes, and the links (or edges) between them were weighted by the social interaction  
frequencies. We quantified three emergent network properties for each lek recording session:  
190 social specialization, network stability, and behavioral assortment, as described below.

For specialization, we sought a measure that would capture the extent to which a network  
192 was partitioned into exclusive social relationships (as opposed to a network made up of non-  
specific or non-exclusive partnerships). To do this, we used a network metric of specialization  
194 that is commonly used in community ecology to analyze ecological networks, called  $H_2'$   
(Blüthgen *et al.* 2006). An advantage of  $H_2'$  is that it is standardized against a theoretical  
196 maximum, based on the overall activity levels of different nodes and Shannon entropy (Blüthgen  
*et al.* 2006); this makes it possible to compare the extent of specialization across different  
198 bipartite networks in a standardized way. To apply this metric to our manakin data, we converted  
each lek social network into its bipartite adjacency matrix, with floaters along one axis, and  
200 territory-holders on the other, and then calculated social specialization as  $H_2'$  using the bipartite  
package (Dormann *et al.* 2019). Higher values of this metric indicate that the network is made up

202 of more exclusive relationships, as illustrated in Fig. S1. We chose to focus on floater-territorial  
specialization because these are by far the most common partnerships in this social system with  
204 reproductive benefits to both parties (Ryder *et al.* 2011a).

To quantify the stability of social relationships, we compared each lek social network  
206 derived from one recording session to that derived from the subsequent recording session within  
the same field season (if available). Network stability was then calculated as the number of male-  
208 male partnerships (network edges) shared by both time points divided by the number of  
partnerships at either time point (i.e., the intersection divided by the union (Dakin & Ryder  
210 preprint in review)). Higher values of stability indicate greater persistence of social relationships  
within the network, independent of any changes in the representation of particular males (nodes)  
212 (Poisot *et al.* 2012). To reduce the influence of partnerships that occurred only rarely (Farine *et*  
*al.* 2017), prior to the stability calculation we filtered the data to include only significant edges  
214 that occurred more often than expected in 1,000 random permutations of the interaction data, and  
at least six times during a recording session (i.e., on average, once per day). Our previous work  
216 has established that network stability is robust to alternative thresholds for occurrence and that  
the wire-tailed manakin networks are more stable than expected by chance (Dakin & Ryder  
218 preprint in review).

Assortment refers to the extent to which individuals associate with similar partners; it can  
220 be due to partner choice (homophily), shared environments, or the social transmission of  
behavior (Dakin & Ryder 2018). Assortment was quantified using Newman's assortativity,  
222 which is a correlation coefficient for the statistical association among linked nodes within a  
network. It ranges from  $-1$  (a negative association), through  $0$  (no association), and up to  $+1$  (a  
224 positive association). To quantify the assortment of cooperative behaviors, we first determined

the daily frequency of two behaviors for each male: his number of social interactions (strength),  
226 and his number of unique social partnerships (degree) per day (Dakin & Ryder 2018). Strength  
and degree are both repeatable measures of a male's cooperative behavior in our study  
228 population (Dakin & Ryder 2018). Next, we computed the average log-transformed strength and  
degree within the recording session for each individual, and then calculated a weighted  
230 assortativity coefficient for the entire social network using the assortnet package (Farine 2016).  
Because assortativity values for strength and degree were highly correlated (Pearson's  $r = 0.78$ ,  $p$   
232  $< 0.0001$ ,  $n = 86$ ), we took the average of these two values as the measure of overall behavioral  
assortment within the social network. Finally, we also computed the assortativity of the two  
234 discrete status classes, to ensure that our analysis of behavioral assortment was not solely driven  
by status-specific patterns of assortment.

236

### ***Statistical Models***

238 Following our previous study (Ryder *et al.* in press), we characterized each male's average  
circulating testosterone after statistically accounting for capture conditions ("mean T" in (Ryder  
240 *et al.* in press)), including the time of day and duration of time the bird was in the mist-net  
(Vernasco *et al.* 2019). This measure of among-individual testosterone variation was a  
242 significant predictor of cooperative behavior in our study system, albeit with different  
relationships within each status class (Ryder *et al.* in press). To quantify collective testosterone,  
244 we took the average "mean T" within the social network, weighted by each male's interaction  
frequency (strength) as a measure of his contribution to the network. We calculated collective  
246 testosterone separately for each status class because the effects of hormones on social behavior

are status-dependent in this and other species (Eisenegger *et al.* 2011; Boksem *et al.* 2013; Ryder  
248 *et al.* in press).

To evaluate whether collective testosterone could explain emergent social network  
250 properties, we fit mixed-effects models using the packages lme4 and lmerTest (Bates *et al.* 2018;  
Kuznetsova *et al.* 2018). Each model was fit with a random effect of lek to account for repeated  
252 measures ( $n = 86$  measures of 11 leks, except for stability which had  $n = 60$  because stability  
requires a subsequent recording session). We used Akaike's Information Criterion to compare  
254 goodness-of-fit for four candidate models, as follows: (1) collective testosterone of territory-  
holders + collective testosterone of floaters; (2) collective testosterone of territory-holders; (3)  
256 collective testosterone of floaters, and (4) no testosterone predictors. All of the candidate models  
also included additional fixed effects to account for field season (a categorical variable with three  
258 levels), the average Julian date of the recording session, the number of recorded hours per  
territory, and the size of the social network (number of individuals). Continuous predictors were  
260 standardized (mean = 1, SD = 1) prior to being entered into the analysis so that the slope  
estimates would be comparable with other models. Model selection was performed on models fit  
262 with maximum likelihood, and then the best-fit models were refit using restricted estimation of  
maximum likelihood (REML) to determine p-values (Zuur *et al.* 2009). We used the lmerTest  
264 package to compute p-values for generalized mixed-effects models based on Satterthwaite's  
method (Kuznetsova *et al.* 2018).

266 In two field seasons (2016-17 and 2017-18), nine of the territory-holders were part of an  
experiment testing the influence of transiently-elevated testosterone on individual behavior ( $n =$   
268 5 individuals in 2016-17 and  $n = 4$  in 2017-18 (Ryder *et al.* in press)). The results of that  
experiment demonstrated that elevated testosterone caused a temporary decrease in the frequency

270 and the number of cooperative partnerships in the altered males, relative to control males (Ryder  
*et al.* in press). However, it is important to note that this experiment was not designed to test  
272 effects at the collective level, because it was conducted on a limited scale whereby only one or  
two individuals were temporarily altered in only four leks. Therefore, our main analysis here  
274 excluded data from recording sessions at manipulated leks. However, we verified that when we  
repeated our analyses including these manipulated leks, the main conclusions were unchanged.  
276 Furthermore, we did not detect any statistically significant effect of the individual hormone  
manipulation on the three network-level properties (i.e., specialization, stability, and assortment;  
278 all  $p > 0.16$ ). Finally and most importantly, controlling for the manipulation also did not affect  
any of our conclusions about collective testosterone shown in Fig. 2

280

### ***Randomization Test***

282 We performed a randomization test using a null model (Farine *et al.* 2017) to assess the effect of  
randomizing each social network, leaving the testosterone data unchanged. To generate the null  
284 data, we randomly permuted the node labels (ID labels) within each of the 86 social networks,  
retaining all other features of the social network. After generating each null dataset, we  
286 recalculated the network-level properties (specialization, stability, and assortment), and then refit  
the top models from our original analysis. We then compared the slope estimates from the  
288 observed data to the values obtained from 1,000 of these null permutations.

### ***Perturbation Analysis***

We performed a social perturbation analysis to determine the sensitivity of our results to the  
292 composition of the social network (Pinter-Wollman *et al.* 2014). This simulation exercise

proceeded by selectively removing males from the social networks in the observed data, to test  
294 how much perturbation was necessary to disrupt our main results. We set the number of  
individuals removed as a constant proportion of the total number of individuals in the network so  
296 that the effect size would be standardized across heterogeneous networks. To do this, we  
performed six iterations removing an increasing number of either floater or territory-holding  
298 males with each iteration (node removal iterations = 10%, 20%, 30%, 40%, 50%, and 60% of the  
individuals in the relevant status class). The number of individuals removed from each network  
300 was rounded, such that it was at least one, but not all of the individuals from that status class. To  
evaluate the effect of gradually increasing the amount of social perturbation, the simulation  
302 proceeded by removing less social (i.e., low-strength) individuals first. After severing all social  
ties of the removed individuals, we recalculated the network properties, and refit the top models  
304 from our original analysis (Table S1). Then, we compared the beta coefficients for collective  
testosterone (standardized slope estimates) to those derived from the original data. A result was  
306 considered robust to perturbation if two criteria were met: the slope in the removal analysis was  
significantly different from 0, and it was within the 95% confidence interval of the slope from  
308 the original data.

## 310 **Results**

We found that the collective testosterone of territorial males could predict all three properties of  
312 the social networks. Specifically, the leks with a greater number of high-testosterone territorial  
males were less specialized, less stable, and more negatively assorted (Fig. 2; all  $p < 0.03$ ). The  
314 coefficients of these relationships were also greater than expected under a null permutation of the  
data within each social network (inset panels, Fig. 2; all  $p < 0.015$ ).

316 We found that removing as few as 10% of the males in either social class (dominant  
territory-holders or subordinate floaters) eliminated the relationship between stability and  
318 collective testosterone. This indicates that stability is highly sensitive to the presence of both  
status classes of males within the network. In contrast, behavioral assortment was more robust to  
320 the removal of individuals: we had to drop 40% of the territory-holders, or 60% of the floaters, to  
disrupt its association with testosterone. Finally, the sensitivity of social specialization was also  
322 status-dependent: we found that removing only a few floaters (10%) decoupled the relationship  
between specialization and testosterone, whereas 40% of the territorial individuals had to be  
324 removed to eliminate this result.

## 326 **Discussion**

We found that the collective testosterone of dominant, territory-holding males predicted multiple  
328 features of the social network structure. In contrast, the collective testosterone of the floater  
males did not predict social network properties. Therefore, although testosterone may determine  
330 the behavior of both floater and dominant males (Ryder *et al.* in press), its effects on dominant  
males may represent an extended phenotype that ultimately determines social structure (Dawkins  
332 1982).

How can the relationship between hormone levels and network properties be explained in  
334 terms of individual behaviors? Given that testosterone has antagonistic effects on the cooperative  
behavior of territorial males (Ryder *et al.* in press), we hypothesize that the behavior of high-  
336 testosterone individuals causes multiple properties of stable cooperative networks to rapidly  
break down. Based on our results in previous studies (Dakin & Ryder preprint in review; Ryder  
338 *et al.* in press), the high-testosterone dominant individuals have a reduced ability to attract and



maintain stable coalition partners (Ryder *et al.* in press). This weakening of coalition bonds may  
340 cause floater males to prospect elsewhere for new partnerships, negatively impacting both the  
overall specialization and stability of the social network (Dakin & Ryder preprint in review).  
342 Likewise, we propose that behavioral assortment becomes more negative in social networks with  
many high-testosterone individuals, because these individuals may inhibit the processes of social  
344 contagion, reciprocity, and/or behavioral coordination that contribute to positive assortment  
(Dakin & Ryder 2018).

346 Our perturbation analysis suggests that the behavior of the floater males (i.e., initiating  
partnerships) may play a key role in determining social specialization within the network.  
348 Although this analysis is not a substitute for experimental tests *in vivo* (Zyphur *et al.* 2009;  
Akinola *et al.* 2016), it can provide a good indication of the importance of particular individuals  
350 to emergent properties of the network. Conducting experimental tests of causation at the level of  
whole social networks remains a major challenge (Pinter-Wollman *et al.* 2014; James *et al.*  
352 2009). With the present data, we cannot rule out the possibility that high-testosterone individuals  
chose to participate in certain networks due to other factors that may also influence emergent  
354 network properties (e.g., environmental quality and/or female activity). Nevertheless, our data  
show that the increased prevalence of dominant individuals with high-testosterone is associated  
356 with behavioral dynamics and changes to higher-order social structure that can ultimately  
destabilize cooperation. These findings establish that hormone-behavior relationships are not  
358 limited to one individual, but instead they may act as extended phenotypes that have population-  
level consequences (McClintock 1981; Dawkins 1982; Robison 1992). Specifically, we suggest  
360 that testosterone is a physiological driver of social network dynamics that may impede the  
evolution of cooperation.

362 **Figure Legends**

364 **Figure 1. Testosterone varies at the level of the social network.** (A) Circulating testosterone  
varies within- and among-individuals. This graph shows repeated measures from 210 individual  
366 male manakins, sorted along the x-axis by their average testosterone level (standardized “mean  
T”; modified from Ryder et al. (Ryder *et al.* in press)). Opacity is used to denote the two male  
368 status classes (with subordinate floaters colored semi-transparent, and dominant territory-holders  
colored opaque) and color ramping is used to denote each individual’s hormone phenotype. (B-  
370 D) Three examples of the social network structure and hormone phenotypes at manakin display  
leks. Each node (circle) represents an individual male who engaged in social interactions at the  
372 lek. Node size is scaled to his interaction frequency (“strength”); this parameter is also used to  
weight each male’s contribution to collective testosterone. Edge thicknesses are also scaled to the  
374 log-transformed interaction frequencies for each observed coalition. Node colors indicate an  
individual’s hormone phenotype following the scale in (A). The collective testosterone of the  
376 social network is calculated as the average of the individual hormone phenotypes within the  
social network, weighted by strength as a measure of each male’s contribution. Because  
378 hormone-mediated cooperation is status-specific (Ryder *et al.* in press; Eisenegger *et al.* 2011),  
collective testosterone was determined for each status class separately (indicated by the semi-  
380 transparent and opaque color scales for floaters and territory-holders, respectively). See Figure  
S1 for additional data.

382

**Figure 2. Collective testosterone predicts the emergent properties of cooperative social**  
384 **networks.** Lek social networks with greater representation of high-testosterone territorial

individuals were less specialized (i.e., partnerships were less exclusive), less stable over time,  
386 and had more negative behavioral assortment (i.e., individuals tended to associate with more  
dissimilar partners). Each plot shows the partial residuals from a statistical analysis that also  
388 accounts for field season, the average Julian date of the recording session, the number of  
recorded hours per territory, and network size (fixed effects), as well as a random effect of lek  
390 identity. Because the two status classes differ in behavior (Dakin & Ryder 2018), the analysis of  
behavioral assortment also accounted for assortment of the status classes within each network as  
392 an additional covariate. Different symbols are used to indicate repeated measures of 11 different  
leks networks, colored according the collective testosterone gradient in Figure 1B. Inset panels  
394 show the results of a null randomization test. In each case, the slope in the best-fit model (solid  
vertical line) was significantly more negative than expected in the null permutations of the social  
396 networks (grey distribution; dotted vertical line indicates 0; all p-values < 0.015). See Tables S1  
and S2 for additional data.

398 **Acknowledgments**

We thank Camilo Alfonso, Brian Evans, David and Consuelo Romo, Kelly Swing, Diego  
400 Mosquera, Gabriela Vinueza, and Tiputini Biodiversity Station of the Universidad San Francisco  
de Quito. Funding was provided by the National Science Foundation (NSF) IOS 1353085 and  
402 the Smithsonian Migratory Bird Center.

404 **Author Contributions**

RD, ITM, BMH, and TBR designed the study. ITM, BMH, BJV, and TBR collected the data.  
406 RD, ITM, and TBR analyzed the data. RD and TBR wrote the manuscript. All authors edited the  
manuscript.

408

**Declaration of Interests**

410 The authors declare no competing interests.

412 **Data Availability**

All data and R scripts necessary to reproduce this study are available for download at:

414 <https://figshare.com/s/13a311662fee686fa4f3>

416 **Supporting Information**

Figure S1 and Table S1-S2 in the attached PDF

418

## References

- 420 Adkins-Regan, E. (2005). *Hormones and animal social behavior*. Princeton University Press.
- 422 Akinola, M., Page-Gould, E., Mehta, P.H. & Lu, J.G. (2016). Collective hormonal profiles  
predict group performance. *PNAS*, 113, 9774–9779.
- 424 Bates, D., Maechler, M., Bolker, B., Walker, S., Christensen, R.H.B., Singmann, H., *et al.*  
(2018). *lme4 1.1-18-1: linear mixed-effects models using “Eigen” and S4*.
- 426 Blüthgen, N., Menzel, F. & Blüthgen, N. (2006). Measuring specialization in species interaction  
networks. *BMC Ecology*, 6, 9.
- 428 Boksem, M.A.S., Mehta, P.H., Van den Bergh, B., van Son, V., Trautmann, S.T., Roelofs, K., *et al.*  
(2013). Testosterone inhibits trust but promotes reciprocity. *Psychol Sci*, 24, 2306–  
2314.
- 430 Cohen, A.A., Martin, L.B., Wingfield, J.C., McWilliams, S.R. & Dunne, J.A. (2012).  
Physiological regulatory networks: ecological roles and evolutionary constraints. *Trends*  
432 *in Ecology & Evolution*, 27, 428–435.
- 434 Croft, D.P., James, R., Thomas, P.O.R., Hathaway, C., Mawdsley, D., Laland, K.N., *et al.*  
(2006). Social structure and co-operative interactions in a wild population of guppies  
(*Poecilia reticulata*). *Behav Ecol Sociobiol*, 59, 644–650.
- 436 Csardi, G. & coauthors. (2018). *igraph 1.2.2: network analysis and visualization*.
- 438 Dakin, R. & Ryder, T.B. (preprint in review). Reciprocity and behavioral heterogeneity govern  
the stability of social networks. Preprint. <https://doi.org/10.1101/694166>. *preprint in*  
*review*.
- 440 Dakin, R. & Ryder, T.B. (2018). Dynamic network partnerships and social contagion drive  
cooperation. *Proceedings of the Royal Society B: Biological Sciences*, 285, 20181973.
- 442 Dawkins, R. (1982). *The Extended Phenotype: The Gene as the Unit of Selection*. W. H.  
Freeman and Company, San Francisco.
- 444 Dormann, C.F., Fruend, J. & Gruber, B. (2019). *bipartite 2.13: visualising bipartite networks*  
*and calculating some (ecological) indices*.
- 446 Eikenaar, C., Whitham, M., Komdeur, J., van der Velde, M. & Moore, I.T. (2011). Endogenous  
testosterone is not associated with the trade-off between paternal and mating effort.  
448 *Behav Ecol*, 22, 601–608.
- Eisenegger, C., Haushofer, J. & Fehr, E. (2011). The role of testosterone in social interaction.  
450 *Trends in Cognitive Sciences*, 15, 263–271.
- 452 Farine, D.R. (2014). Measuring phenotypic assortment in animal social networks: weighted  
associations are more robust than binary edges. *Animal Behaviour*, 89, 141–153.
- 454 Farine, D.R. (2016). *assortnet 0.12: calculate the assortativity coefficient of weighted and binary*  
*networks*.
- 456 Farine, D.R., Freckleton, R. & Rands, S. (2017). A guide to null models for animal social  
network analysis. *Methods in Ecology and Evolution*, 8, 1309–1320.
- 458 Fowler, J.H. & Christakis, N.A. (2010). Cooperative behavior cascades in human social  
networks. *PNAS*, 107, 5334–5338.
- 460 Fuxjager, M.J., Forbes-Lorman, R.M., Coss, D.J., Auger, C.J., Auger, A.P. & Marler, C.A.  
(2010). Winning territorial disputes selectively enhances androgen sensitivity in neural  
pathways related to motivation and social aggression. *PNAS*, 107, 12393–12398.
- 462 Goymann, W. (2009). Social modulation of androgens in male birds. *General and Comparative*  
*Endocrinology*, 9th International Symposium on Avian Endocrinology, 163, 149–157.

- 464 Goymann, W., Schwabl, I., Trappschuh, M. & Hau, M. (2007). Use of ethanol for preserving  
steroid and indoleamine hormones in bird plasma. *General and Comparative*  
466 *Endocrinology*, 150, 191–195.
- Heindl, M. (2002). Social organization on leks of the wire-tailed manakin in southern venezuela.  
468 *The Condor*, 104, 772–779.
- James, R., Croft, D.P. & Krause, J. (2009). Potential banana skins in animal social network  
470 analysis. *Behav Ecol Sociobiol*, 63, 989–997.
- Jehn, K.A. & Shah, P.P. (1997). Interpersonal relationships and task performance: an  
472 examination of mediation processes in friendship and acquaintance groups. *Journal of*  
*Personality and Social Psychology*, 72, 775–790.
- 474 Krause, J. & Ruxton, G.D. (2002). *Living in Groups*. OUP Oxford.
- Kuznetsova, A., Brockhoff, P.B. & Christensen, R.H.B. (2018). *lmerTest 3.0-1: tests in linear*  
476 *mixed effects models*.
- Laskowski, K.L., Montiglio, P.-O. & Pruitt, J.N. (2016). Individual and group performance  
478 suffers from social niche disruption. *The American Naturalist*, 187, 776–785.
- McClintock, M.K. (1981). Social control of the ovarian cycle and the function of estrous  
480 synchrony. *Integr Comp Biol*, 21, 243–256.
- McDonald, D.B. (1993). Delayed plumage maturation and orderly queues for status: a manakin  
482 mannequin experiment. *Ethology*, 94, 31–45.
- Ohtsuki, H., Hauert, C., Lieberman, E. & Nowak, M.A. (2006). A simple rule for the evolution  
484 of cooperation on graphs and social networks. *Nature*, 441, 502–505.
- Oyegbile, T.O. & Marler, C.A. (2005). Winning fights elevates testosterone levels in California  
486 mice and enhances future ability to win fights. *Hormones and Behavior*, 48, 259–267.
- Pinter-Wollman, N., Hobson, E.A., Smith, J.E., Edelman, A.J., Shizuka, D., de Silva, S., *et al.*  
488 (2014). The dynamics of animal social networks: analytical, conceptual, and theoretical  
advances. *Behav Ecol*, 25, 242–255.
- 490 Poisot, T., Canard, E., Mouillot, D., Mouquet, N. & Gravel, D. (2012). The dissimilarity of  
species interaction networks. *Ecology Letters*, 15, 1353–1361.
- 492 R Core Team. (2018). *R 3.5.1: A Language and Environment for Statistical Computing*. R  
Foundation for Statistical Computing, Vienna, Austria.
- 494 Roberts, G. & Sherratt, T.N. (1998). Development of cooperative relationships through  
increasing investment. *Nature*, 394, 175.
- 496 Robinson, G.E. (1992). Regulation of division of labor in insect societies. *Annual Review of*  
*Entomology*, 37, 637–665.
- 498 Ryder, T.B., Blake, J.G., Parker, P.G. & Loiselle, B.A. (2011a). The composition, stability, and  
kinship of reproductive coalitions in a lekking bird. *Behav Ecol*, 22, 282–290.
- 500 Ryder, T.B., Dakin, R., Vernasco, B.J., Horton, B.M. & Moore, I.T. (in press). Testosterone  
modulates status-specific patterns of cooperation in a social network. Preprint.  
502 <https://doi.org/10.1101/453548>. *American Naturalist*.
- Ryder, T.B., Horton, B.M. & Moore, I.T. (2011b). Understanding testosterone variation in a  
504 tropical lek-breeding bird. *Biology Letters*, 7, 506–509.
- Ryder, T.B., Horton, B.M., Tillaart, M. van den, Morales, J.D.D. & Moore, I.T. (2012).  
506 Proximity data-loggers increase the quantity and quality of social network data. *Biology*  
*Letters*, 8, 917–920.

- 508 Ryder, T.B., McDonald, D.B., Blake, J.G., Parker, P.G. & Loiselle, B.A. (2008). Social networks  
510 in the lek-mating wire-tailed manakin (*Pipra filicauda*). *Proceedings of the Royal Society*  
*B*, 275, 1367–1374.
- Ryder, T.B., Parker, P.G., Blake, J.G. & Loiselle, B.A. (2009). It takes two to tango:  
512 reproductive skew and social correlates of male mating success in a lek-breeding bird.  
*Proceedings of the Royal Society B*, 276, 2377–2384.
- 514 Schjelderup-Ebbe, T. (1922). Beiträge zur sozialpsychologie des haushuhns. [Observation on the  
social psychology of domestic fowls.]. *Zeitschrift für Psychologie und Physiologie der*  
516 *Sinnesorgane. Abt. 1. Zeitschrift für Psychologie*, 88, 225–252.
- Trainer, J.M. & McDonald, D.B. (1995). Singing performance, frequency matching and  
518 courtship success of long-tailed manakins (*Chiroxiphia linearis*). *Behav Ecol Sociobiol*,  
37, 249–254.
- 520 Trainer, J.M., McDonald, D.B. & Learn, W.A. (2002). The development of coordinated singing  
in cooperatively displaying long-tailed manakins. *Behav Ecol*, 13, 65–69.
- 522 Trivers, R.L. (1971). The evolution of reciprocal altruism. *The Quarterly Review of Biology*, 46,  
35–57.
- 524 Vernasco, B.J., Horton, B.M., Ryder, T.B. & Moore, I.T. (2019). Sampling baseline androgens in  
free-living passerines: Methodological considerations and solutions. *General and*  
526 *Comparative Endocrinology, Endocrinology of Neotropical Vertebrates*, 273, 202–208.
- Wingfield, J.C., Hegner, R.E., Dufty, Alfred M. & Ball, G.F. (1990). The “challenge  
528 hypothesis”: theoretical implications for patterns of testosterone secretion, mating  
systems, and breeding strategies. *The American Naturalist*, 136, 829–846.
- 530 Zuur, A., Ieno, E.N., Walker, N., Saveliev, A.A. & Smith, G.M. (2009). *Mixed effects models*  
*and extensions in ecology with R*. Springer Science & Business Media.
- 532 Zyphur, M.J., Narayanan, J., Koh, G. & Koh, D. (2009). Testosterone–status mismatch lowers  
collective efficacy in groups: evidence from a slope-as-predictor multilevel structural  
534 equation model. *Organizational Behavior and Human Decision Processes, Biological*  
Basis of Business, 110, 70–79.
- 536

Figure 1

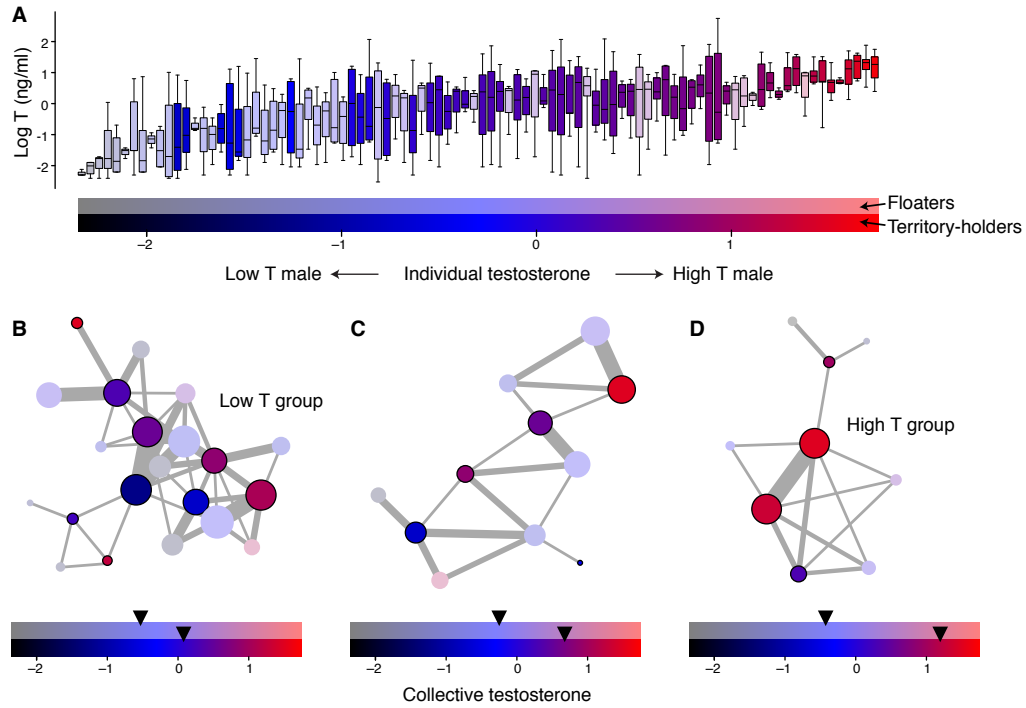



Figure 2

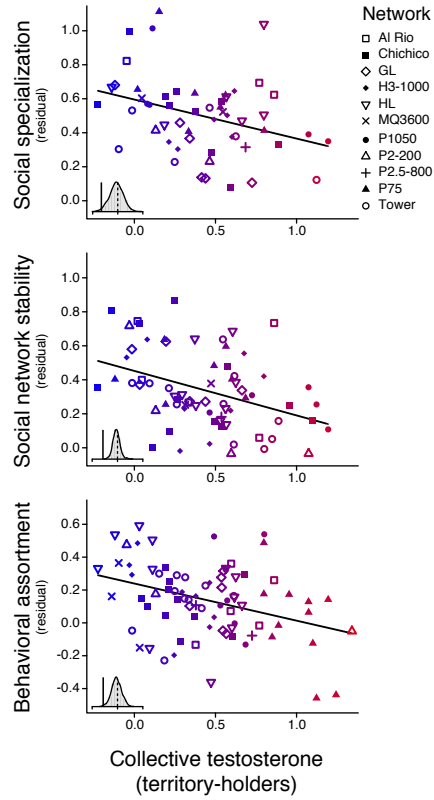

Source: https://www.biorxiv.org/content/10.1101/737650v2.full.pdf
